# Supplementary material for: KIT over-expression by p55PIK-PI3K leads to Imatinib-resistance in patients with gastrointestinal stromal tumors
Source: PubMed Central journal article supplement (PMC4811466; doi:10.18632/oncotarget.6011), 2015-10-22
Supplement: oncotarget-07-1367-s001.pdf [file oncotarget-07-1367-s001.pdf]

## SUPPLEMENTARY FIGURES AND TABLE

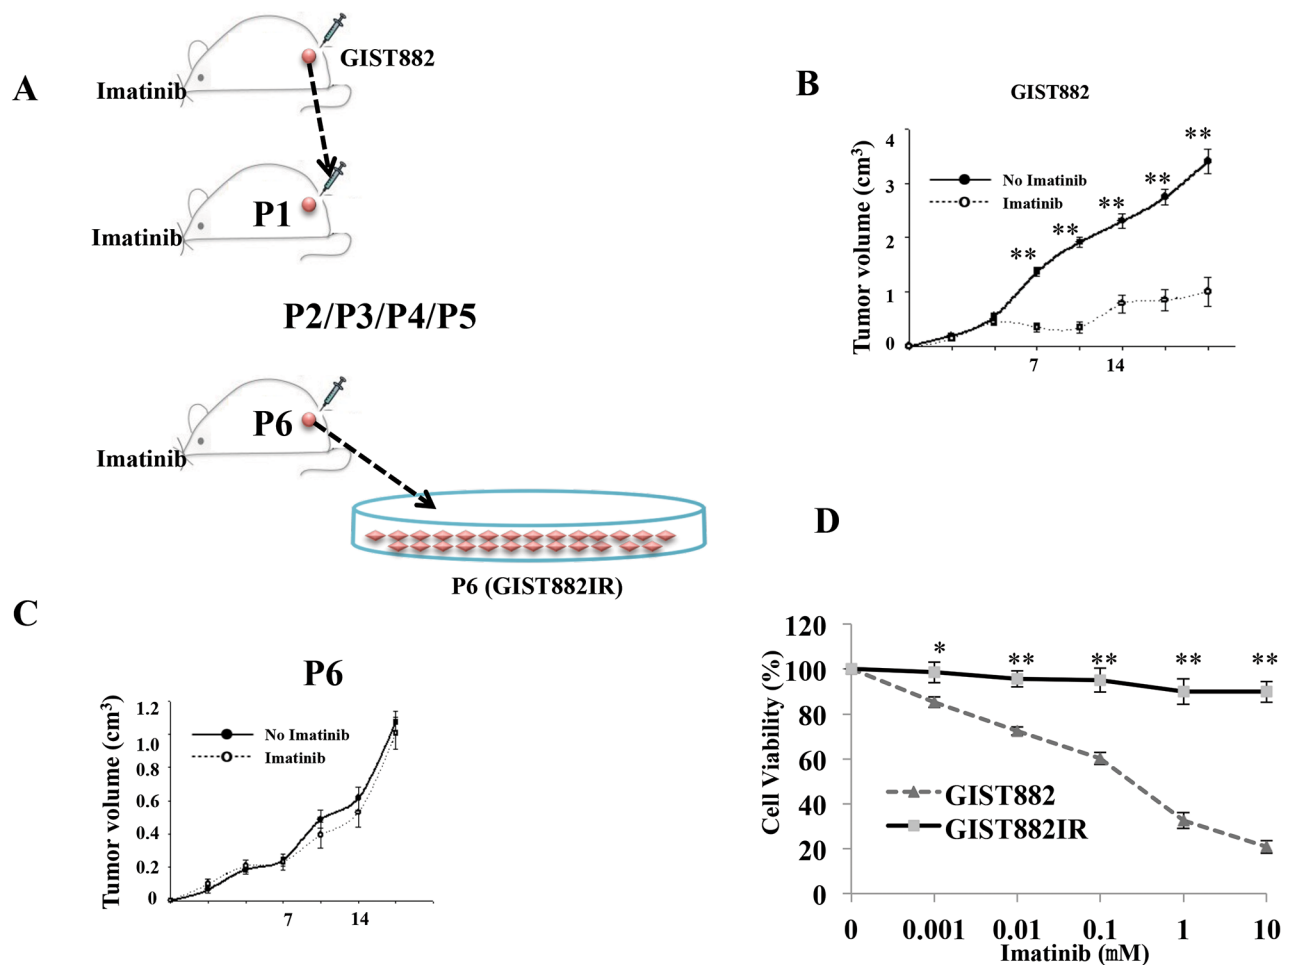

**Supplementary Figure S1: Establishment of GIST882IR cells.** **A.** GIST882 cells were inoculated in female nude mice and at day 7 after inoculation, mice were treated by oral gavage with Imatinib (100 mg/kg) daily for 3 weeks. Then, the tumors (named P1) were removed from mice, cut into small pieces and replanted to new female mice. This procedure was repeated 6 times and tumors removed from the last passage (P6) were characterized. **B.** Inhibitory effects of Imatinib on the growth of GIST882 cells *in vivo*. GIST882 cells were inoculated in nude mice and the mice were divided into two groups and administered with vehicle or Imatinib (100 mg/kg) daily for 3 weeks. The size of tumors was measured. \*\* $p < 0.01$ . **C.** Growth curve of GIST882IR cells *in vivo* treated with or without Imatinib. Cells derived from P6 tumors were expanded and collected (named as GIST882IR). GIST882IR cells were inoculated in female nude mice and at day 7 after inoculation, mice were divided into 2 groups and treated by oral gavage either with Imatinib (100 mg/kg) or control solvent daily for 3 weeks. The tumor volumes were measured. **D.** IR in GIST882IR cells. Cell viability of GIST882 and GIST882IR cells after treatment with Imatinib was measured. \* $p < 0.05$ ; \*\* $p < 0.01$ .

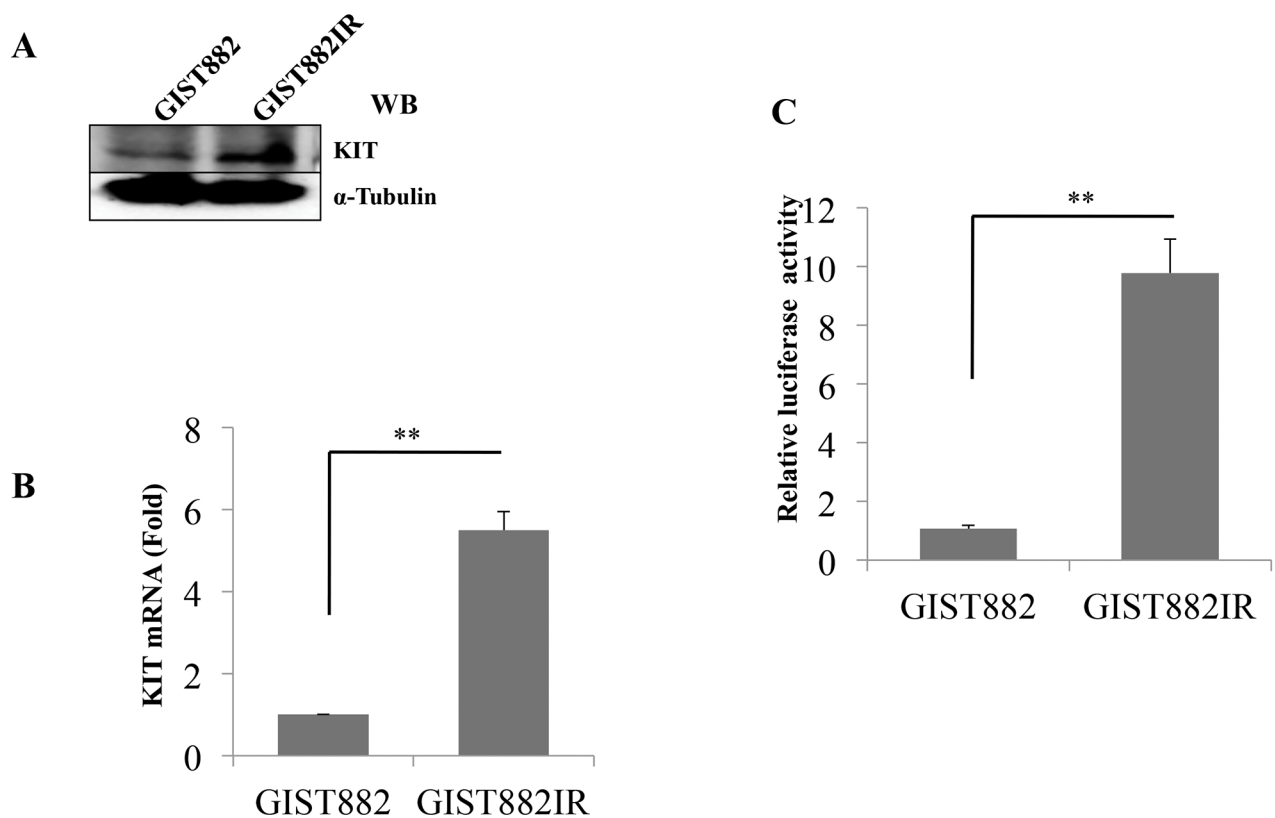

**Supplementary Figure S2: Over-expression of KIT in GIST882IR cells.** **A.** Protein level of KIT in GIST882 and GIST882IR cells. Lysates from GIST882 and GIST882IR cells were prepared and the protein levels of KIT were measured by Western blotting. **B.** mRNA level of KIT in GIST882 and GIST882IR cells. Total RNA was isolated from GIST882 and GIST882IR cells and the expression of KIT mRNA was determined.  $**p < 0.01$ . **C.** Transcription activity of KIT promoter in GIST882 and GIST882IR cells. Cultured GIST882 and GIST882IR cells were transfected with KIT promoter reporter plasmids, the cellular lysates were prepared 48 h after transfection and the luciferase activity was determined using a Kit from Promega.  $**p < 0.01$ .

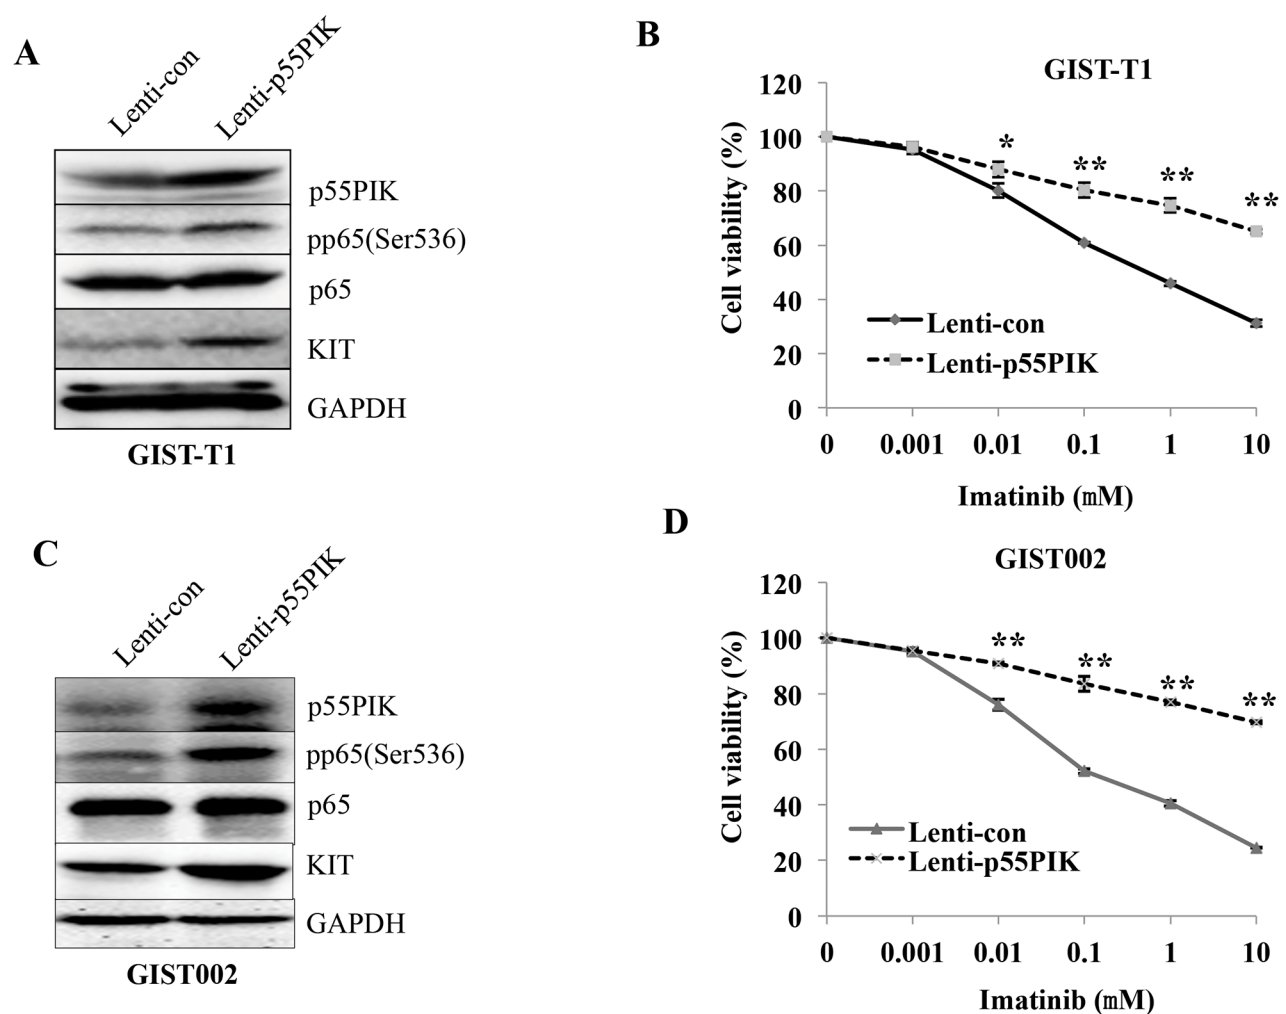

**Supplementary Figure S3: Over-expression of p55PIK increased the expression of KIT and led to the IR in GIST-T1 and primary cultured GIST cells.** **A.** Over-expression of p55PIK increased the expression of KIT and phosphorylation of NF- $\kappa$ B p65 in GIST-T1 cells. GIST-T1 cells were infected with Lenti-p55PIK or Lenti-con. Cell lysates were prepared and the expression of p65, pp65(Ser536), p55PIK, and KIT was examined by Western blotting. **B.** IR in GIST-T1 cells over-expressing p55PIK. GIST-T1 cells were infected with Lenti-p55PIK or Lenti-con overnight and treated with various concentration of Imatinib for 72 h. Cell viability was measured. **C.** Over-expression of p55PIK increased the expression of KIT and phosphorylation of NF- $\kappa$ B p65 in primary GIST002 cells. GIST002 cells were infected with Lenti-p55PIK or Lenti-con. Cell lysates were prepared and the expression of p65, pp65(Ser536), p55PIK, and KIT was examined by Western blotting. **D.** IR in primary GIST002 cells over-expressing p55PIK. GIST002 cells were infected with Lenti-p55PIK or Lenti-con overnight and treated with various concentration of Imatinib for 72 h. Cell viability was measured. \* $p < 0.05$ ; \*\* $p < 0.01$ .

**Supplementary Table S1: Characterization of tumor samples from GIST patients**

| No. | Sex    | KIT mutations<br>(primary tumors)                     | Duration between<br>surgeries (Year) | KIT mutations<br>(recurrent tumors)                   |
|-----|--------|-------------------------------------------------------|--------------------------------------|-------------------------------------------------------|
| 1   | Male   | 11 <sup>V559D</sup>                                   | 3.1                                  | 11 <sup>V559D</sup>                                   |
| 2   | Female | 11 <sup>V560del</sup>                                 | 2.7                                  | 11 <sup>V560del</sup>                                 |
| 3   | Male   | 11 <sup>V559del</sup>                                 | 2.0                                  | 11 <sup>V559del</sup> , 13 <sup>K642E</sup>           |
| 4   | Male   | 9 <sup>A502-Y503dup</sup> , 11 <sup>K558V559del</sup> | 1.1                                  | 9 <sup>A502-Y503dup</sup> , 11 <sup>K558V559del</sup> |
| 5   | Male   | 11 <sup>V559D</sup>                                   | 2.5                                  | 11 <sup>V559D</sup> , 17 <sup>Y823D</sup>             |
| 6   | Male   | 11 <sup>W557R</sup>                                   | 3.5                                  | 11 <sup>W557R</sup>                                   |
| 7   | Male   | 11 <sup>W557D572del</sup>                             | 2.2                                  | 11 <sup>W557D572del</sup>                             |
| 8   | Male   | 11 <sup>K558N+V559del</sup>                           | 4.1                                  | 11 <sup>K558N+V559del</sup>                           |
